# Supplementary material for: Synthesis of poly(N-isopropylacrylamide) polymer crosslinked with an AIE-active azonaphthol for thermoreversible fluorescence
Source: Royal Society of Chemistry journal article supplement (doi:10.1039/d0ra08257k), 2020-01-01
Supplement: d0ra08257k1.pdf [file d0ra08257k1.pdf]

## Supporting Information

for

### **Synthesis of poly(N-isopropylacrylamide) polymer crosslinked with an AIE-active azonaphthol for thermoreversible fluorescence**

Mintaek Oh, Yeju Yoon, Taek Seung Lee\*

Organic and Optoelectronic Materials Laboratory, Department of Advanced Organic Materials and Textile System Engineering, Chungnam National University, Daejeon 34134, Korea

\*Corresponding author: TSL (tslee@cnu.ac.kr)

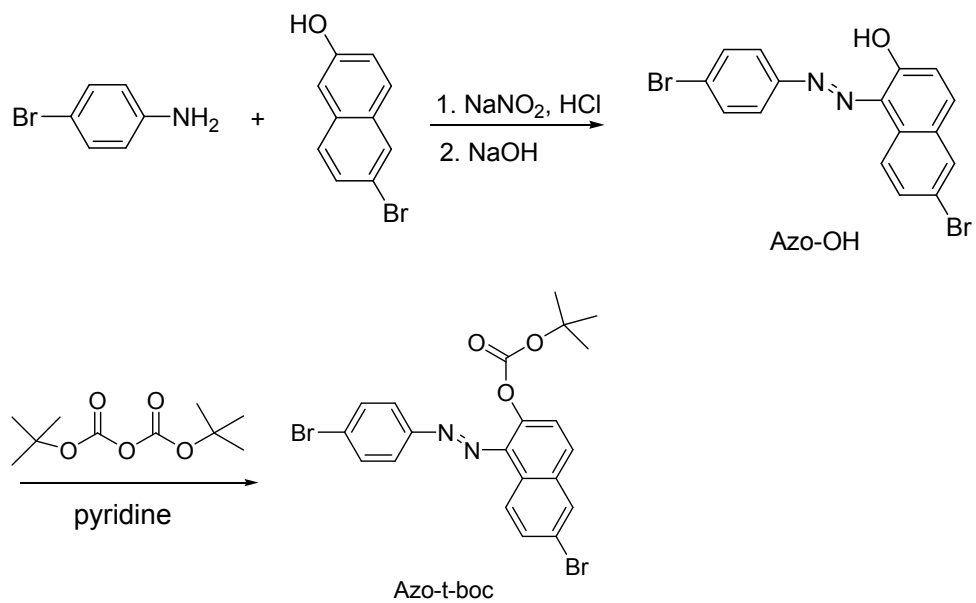

**Scheme S1.** Synthesis of Azo-t-boc.

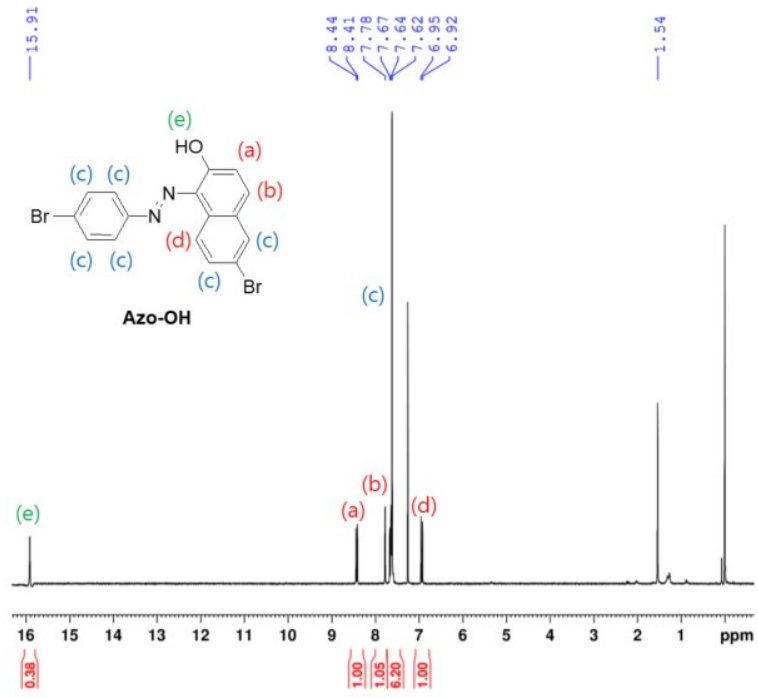

(a)

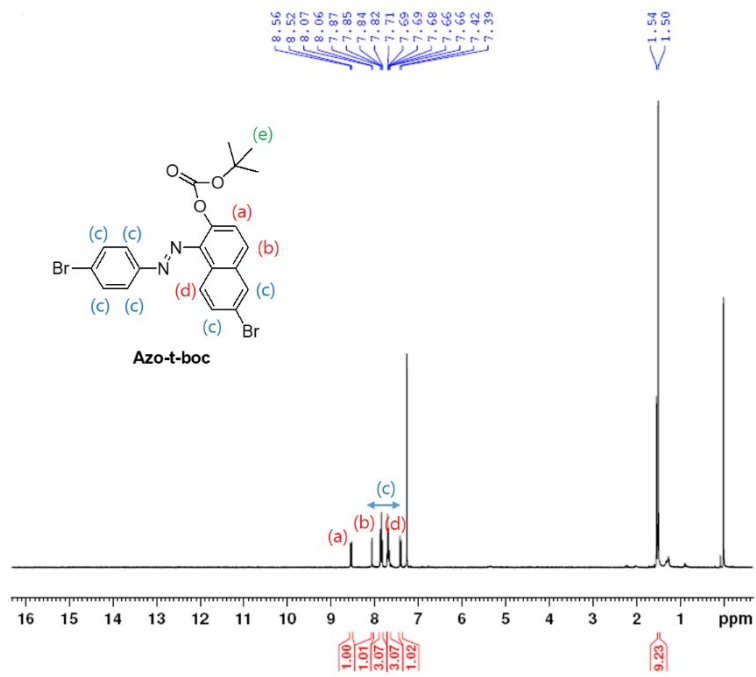

(b)

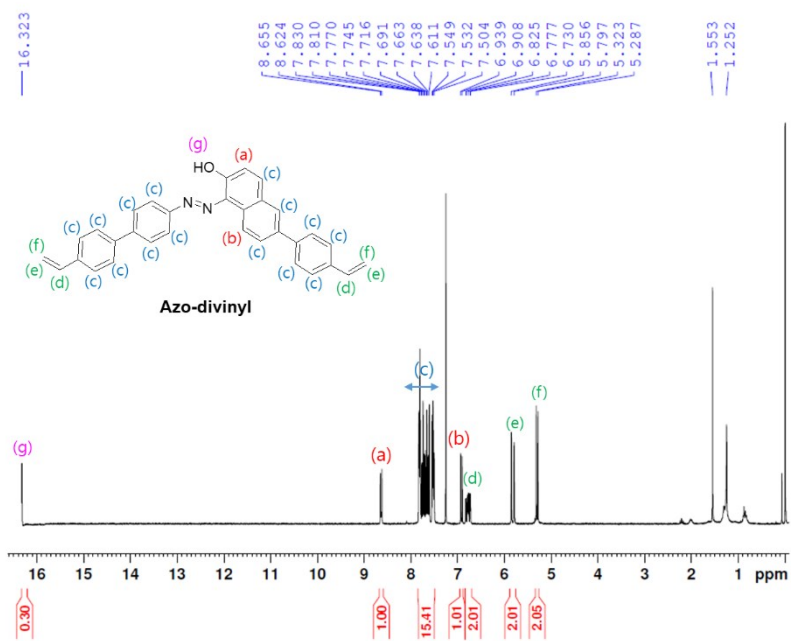

(c)

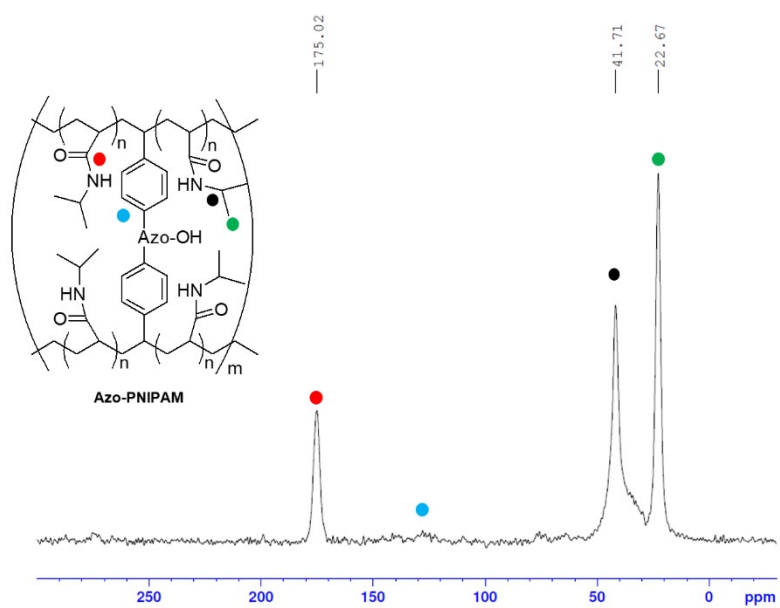

(d)

**Figure S1.** <sup>1</sup>H-NMR spectra of (a) Azo-OH, (b) Azo-t-boc, and (c) Azo-divinyl. (d) <sup>13</sup>C solid-state NMR spectrum of Azo-PNIPAM.

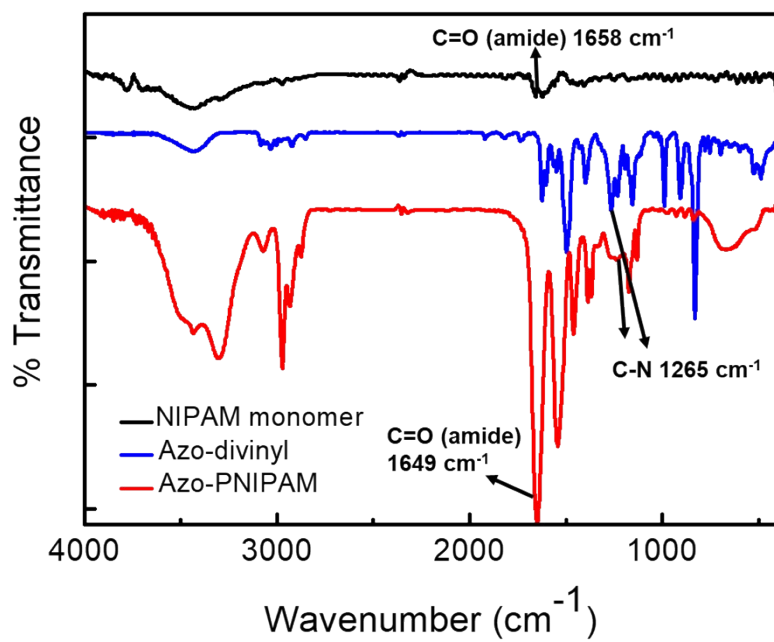

**Figure S2.** FT-IR spectra of NIPAM, Azo-divinyl, and Azo-PNIPAM.

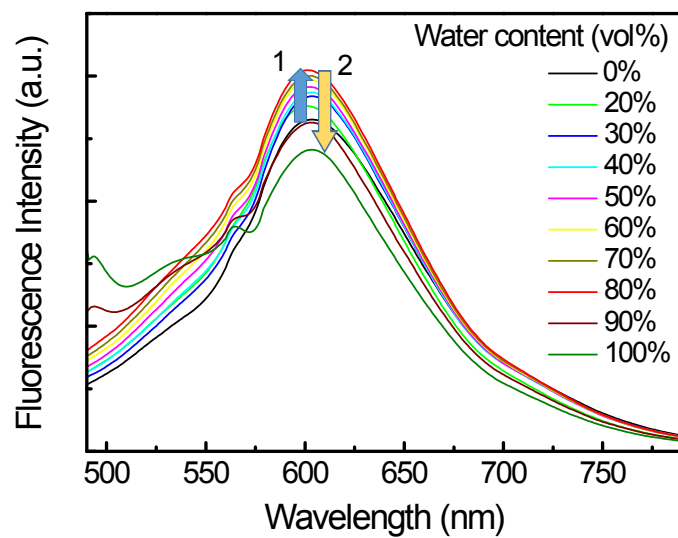

**Figure S3.** Changes in the fluorescence spectra of Azo-PNIPAM in THF solution (3 mg/mL) with increasing water content. Excitation wavelength 450 nm.

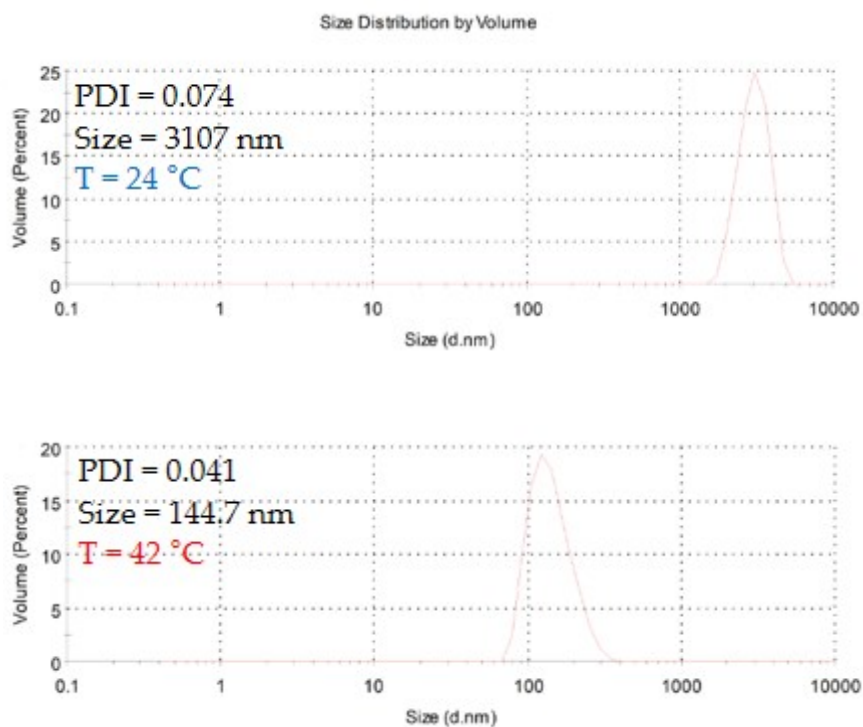

(a)

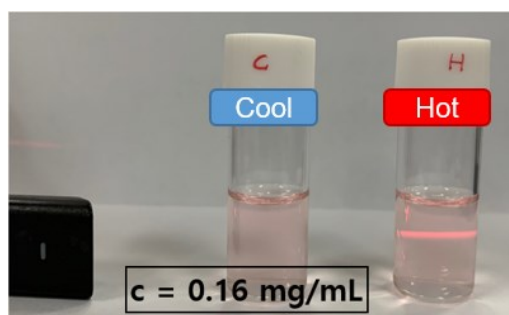

(b)

**Figure S4.** (a) Particle size distributions of Azo-PNIPAM in aqueous solution (1.1 mg/mL) (b) at 24 °C (above) and at 42 °C (below). (b) Visualization of deaggregation (left) and aggregation (right) of Azo-PNIPAM in aqueous solution (0.16 mg/mL) using a laser pointer (0.83  $\mu\text{m}$ ), showing a beam path only in the right vial.

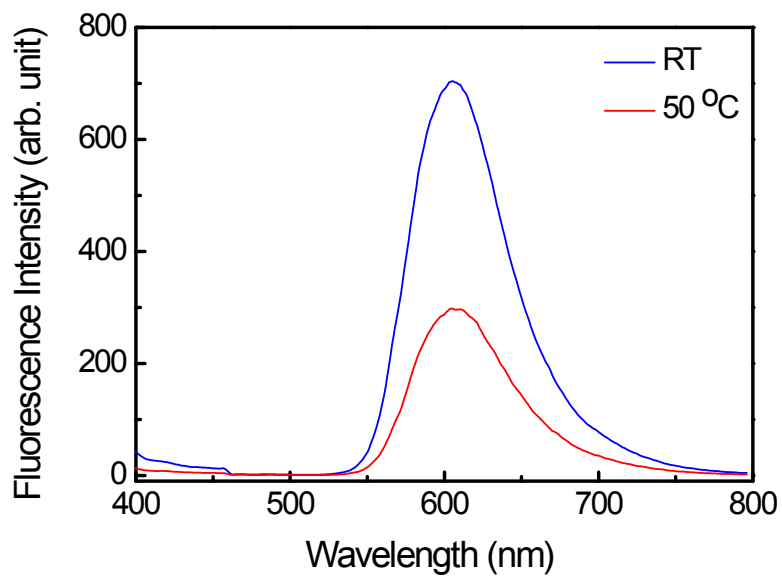

**Figure S5.** Changes in the fluorescence spectra of Azo-OH film at different temperatures.



**Table S1.** Summary of Literature Reports on Thermoresponsive Polymers Based on PNIPAM with AIEgen

| Polymer       | AIE unit                                                               | Fluorescence enhancement (%) upon heating | Ref.      |
|---------------|------------------------------------------------------------------------|-------------------------------------------|-----------|
| PNIPAM-b-P4VP | 4-(9-(2-(4-Hydroxyphenyl)ethynyl)-7,10-diphenylfluoranthen-8-yl)phenol | 210                                       | 39        |
| PNIPAM-b-PDPA | TPE (Tetraphenylethylene)                                              | 250                                       | 52        |
| PNIPAM-b-PMMA | TPE                                                                    | 240                                       | 67        |
| PNIPAM        | ANTH (Anthracene)                                                      | 200                                       | 69        |
| PNIPAM        | TPE                                                                    | 150                                       | 68        |
| PNIPAM        | TPE                                                                    | 137                                       | 66        |
| PNIPAM        | Tetraphenylthiophene                                                   | 107                                       | 70        |
| PNIPAM        | Azo-naphthol                                                           | 130                                       | This work |

Fluorescence enhancement (%) =  $I/I_0 \times 100$  (%)

where  $I_0$  and  $I$  correspond to fluorescence intensity before and after heating
